# Supplementary material
Source: HighWire-hosted journal article supplement (https://www.life-science-alliance.org/content/5/2/e202101067/F8)

# Source Data for Figure 7B

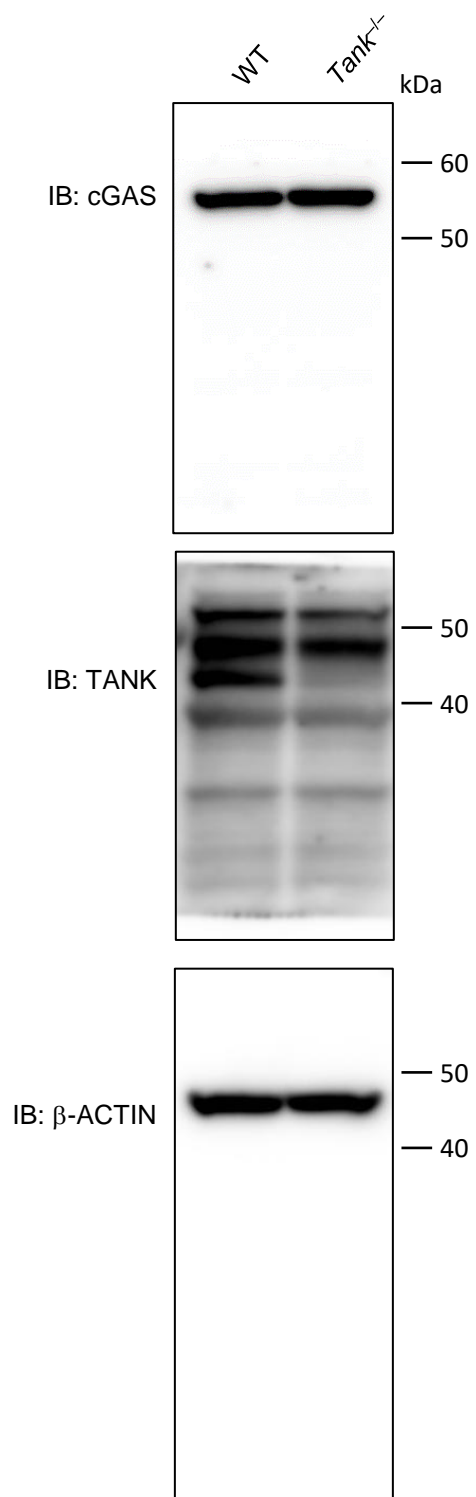

Supplement: inline-supplementary-material-9 [file inline-supplementary-material-9.pdf]
